# Supplementary material for: Anti-Toxin Responses to Natural Enterotoxigenic Escherichia coli (ETEC) Infection in Adults and Children in Bangladesh
Source: MDPI journal article supplement (doi:10.3390/microorganisms11102524), 2023-10-09
Supplement: s1 [file s1]

## Supplementary Material

**Table S1**

|          |        | anti-LTB IgG |         |        | anti-LTB IgA |         |        | anti-LTA IgG |         |       | total responders |         |        |
|----------|--------|--------------|---------|--------|--------------|---------|--------|--------------|---------|-------|------------------|---------|--------|
|          |        | LT+/ST-      | LT+/ST+ | ST+    | LT+/ST-      | LT+/ST+ | ST+    | LT+/ST-      | LT+/ST+ | ST+   | LT+/ST-          | LT+/ST+ | ST+    |
| Children | 2 fold | 3 (9%)       | 5 (15%) | 2(17%) | 5(15%)       | 2(6%)   | 4(27%) | 2(6%)        | 4(12%)  | 1(8%) | 7(21%)           | 6(18%)  | 5(42%) |
|          | 4 fold | 1 (3%)       | 3 (9%)  | 1(8%)  | 1(3%)        | 0(0%)   | 1(7%)  | 1 (3%)       | 3 (9%)  | 0(0%) | 2(6%)            | 3(9%)   | 2(17%) |
| Adults   | 2 fold | 1(4%)        | 4(14%)  | 1(7%)  | 1(4%)        | 2(8%)   | 0(0%)  | 1(4%)        | 4(14%)  | 1(7%) | 1(4%)            | 4(14%)  | 2(14%) |
|          | 4 fold | 1(4%)        | 2(7%)   | 0(0%)  | 0(0%)        | 1(4%)   | 0(0%)  | 1(4%)        | 2(7%)   | 0(0%) | 1(4%)            | 2(7%)   | 0(0%)  |

**Table S1: Anti-LTB IgG/IgA and anti-LTA IgG responder rates for ETEC infection grouped based on the presence of the LT and ST genes.** Number of patients and their percentage in corresponding population with 2- or 4- fold increase in plasma IgG or IgA titers at any sampling day compared to day 2 (or IgG) or day 30 (for IgA) are given for LTB and LTA separately, or for all subjects with 2- or 4-fold increase for any of the antigen or antibody isotype tested (total responders).

**Table S2**

|            |                  | ELISA (end point titers) |       |       |         |       |       |
|------------|------------------|--------------------------|-------|-------|---------|-------|-------|
| Subject ID | Subject type     | LTB IgG                  |       |       | CTB IgG |       |       |
|            |                  | D2                       | D7    | D30   | D2      | D7    | D30   |
| D0110018   | LT/STh, adult    | 866                      | 1133  | 1866  | 67      | 76    | 131   |
| D0110020   | LT/STh, adult    | 2389                     | 2601  | 2202  | 57      | 52    | 30    |
| D0110022   | LT/STh, adult    | 2303                     | 28677 | 10171 | 127     | 3.051 | 498   |
| D0110016   | LT/STp, adult    | 473                      | 416   | 524   | 48      | 507   | 588   |
| D0110024   | LT, adult        | 583                      | 4910  | 3292  | 29      | 1.397 | 1.168 |
| M0210073   | STh, adult       | 243                      | 299   | 822   | 70      | 71    | 133   |
| M0220023   | LT/STh, 9 months | 1342                     | 10007 | 5561  | 81      | 485   | 197   |
| M0220063   | LT/STh, 3 years  | 691                      | 455   | 1522  | 123     | 1.504 | 607   |
| M0220057   | LT/STh, 3 years  | 1080                     | 840   | 987   | 114     | 94    | 190   |
| M0220005   | LT/STp, 1 year   | 699                      | 1089  | 1123  | 170     | 97    | 106   |
| M0220062   | LT/STp, 2 years  | 1841                     | 19657 | 13957 | 235     | 3.952 | 3.146 |
| M0220133   | LT/STp, 2 years  | 944                      | 904   | 746   | 58      | 87    | 85    |
| M0220061   | LT, 1 year       | 1027                     | 2623  | 6227  | 96      | 562   | 1.731 |
| M0220064   | LT, 1 year       | 1670                     | 2165  | 1853  | 148     | 160   | 148   |
| M0220086   | LT, 3 years      | 22690                    | 16360 | 6890  | 4.762   | 4.280 | 2.256 |
| M0220096   | LT, 2 years      | 793                      | 1463  | 908   | 141     | 206   | 148   |
| M0220104   | LT, 2 years      | 11782                    | 24777 | 15389 | 1.725   | 2.766 | 2.102 |

|            |               | ELISA (end point titers) |      |      |         |     |     |
|------------|---------------|--------------------------|------|------|---------|-----|-----|
| Subject ID | Subject type  | LTB IgG                  |      |      | CTB IgG |     |     |
|            |               | D2                       | D7   | D30  | D2      | D7  | D30 |
| M0220172   | LT, 1 year    | 2549                     | 4582 | 1636 | 774     | 898 | 578 |
| M0220056   | STh, 3 years  | 2745                     | 2740 | 2217 | 434     | 419 | 393 |
| M0220077   | STh, 4 years  | 3082                     | 823  | 813  | 202     | 143 | 168 |
| M0220157   | STp, 4 years  | 8410                     | 8421 | 5135 | 262     | 259 | 301 |
| M0250225   | healthy adult | 2582                     |      |      | 141     |     |     |
| M0250215   | healthy adult | 1434                     |      |      | 118     |     |     |

**Table S2: Anti-LTB IgG and anti-CTB IgG end point titers for selected patients with ETEC infection or healthy adults.** Subject ID, Subject type including age of patient and type of ETEC infection based on toxin expression and corresponding plasma anti-LTB anti-CTB IgG end point titers at day 2, day 7 and day 30 after onset of symptoms for selected patients with ETEC infection or at on time point for healthy adults.
